# Supplementary material for: Kentucky Outreach Service Kiosk (KyOSK) Study protocol: a community-level, controlled quasi-experimental, type 1 hybrid effectiveness study to assess implementation, effectiveness and cost-effectiveness of a community-tailored harm reduction kiosk on HIV, HCV and overdose risk in rural Appalachia
Source: PubMed Central journal article supplement — BMJ Open. 2024 Mar 1;14(3):e083983. doi: 10.1136/bmjopen-2024-083983 (PMC10910671; doi:10.1136/bmjopen-2024-083983), 2024-03-01
Supplement: bmjopen-2024-083983.reviewer_comments.pdf [file bmjopen-2024-083983.reviewer_comments.pdf]

## PEER REVIEW HISTORY

BMJ Open publishes all reviews undertaken for accepted manuscripts. Reviewers are asked to complete a checklist review form (<http://bmjopen.bmj.com/site/about/resources/checklist.pdf>) and are provided with free text boxes to elaborate on their assessment. These free text comments are reproduced below.

## ARTICLE DETAILS

|                            |                                                                                                                                                                                                                                                                                                                                               |
|----------------------------|-----------------------------------------------------------------------------------------------------------------------------------------------------------------------------------------------------------------------------------------------------------------------------------------------------------------------------------------------|
| <b>TITLE (PROVISIONAL)</b> | The Kentucky Outreach Service Kiosk (KyOSK) Study Protocol: A community-level, controlled quasi-experimental, Type 1 hybrid effectiveness study to assess implementation, effectiveness, and cost-effectiveness of a community-tailored harm reduction kiosk on HIV, HCV, and overdose risk in rural Appalachia                               |
| <b>AUTHORS</b>             | Young, April; Havens, Jennifer R.; Cooper, Hannah; Fallin-Bennett, Amanda; Fanucchi, Laura; Freeman, Patricia; Knudsen, Hannah; Livingston, Melvin; McCollister, Kathryn E.; Stone, Jack; Vickerman, Peter; Freeman, Edward; Jahangir, Tasfia; Larimore, Elizabeth; White, Carol; Cheatom, Chelsi; KyOSK, Community Staff; KyOSK, Design Team |

This article was not externally reviewed at BMJ Open. Protocols that have been independently assessed prior to submission to BMJ Open are usually fast-tracked to publication on the grounds that further substantial changes will not be possible. This independent assessment will usually be external, independent review for both a substantial grant award from a non-commercial or government funder and ethics approval.
